# Supplementary material for: Early C-reactive protein kinetics predicts immunotherapy response in non-small cell lung cancer in the phase III OAK trial
Source: PubMed Central journal article supplement (PMC10121335; doi:10.1093/jncics/pkad027), 2023-04-02
Supplement: pkad027_supplementary_data.pdf [file pkad027_supplementary_data.pdf]

## Supplementary Material

**Supplementary Table 1:** Baseline Characteristics of the OAK cohort stratified by CRP kinetics

| Characteristic               | Flare-Responder, N = 65 <sup>1</sup> | Responder, N = 297 <sup>1</sup> | Non-Responder, N = 396 <sup>1</sup> | p-value <sup>2</sup> |
|------------------------------|--------------------------------------|---------------------------------|-------------------------------------|----------------------|
| Age Group 65                 |                                      |                                 |                                     | 0.5                  |
| < 65                         | 32 (49%)                             | 168 (57%)                       | 211 (53%)                           |                      |
| >= 65                        | 33 (51%)                             | 129 (43%)                       | 185 (47%)                           |                      |
| sex                          |                                      |                                 |                                     | 0.3                  |
| female                       | 31 (48%)                             | 110 (37%)                       | 149 (38%)                           |                      |
| male                         | 34 (52%)                             | 187 (63%)                       | 247 (62%)                           |                      |
| ECOG Performance Score       |                                      |                                 |                                     | 0.083                |
| 0                            | 34 (52%)                             | 115 (39%)                       | 177 (45%)                           |                      |
| 1                            | 31 (48%)                             | 182 (61%)                       | 219 (55%)                           |                      |
| smoking history              |                                      |                                 |                                     | 0.7                  |
| current                      | 10 (15%)                             | 48 (16%)                        | 61 (15%)                            |                      |
| never                        | 13 (20%)                             | 44 (15%)                        | 73 (18%)                            |                      |
| former                       | 42 (65%)                             | 205 (69%)                       | 262 (66%)                           |                      |
| PD-L1 expression             |                                      |                                 |                                     | 0.3                  |
| TC0 and IC0                  | 21 (32%)                             | 124 (42%)                       | 175 (44%)                           |                      |
| TC1/2/3 or IC1/2/3           | 44 (68%)                             | 169 (57%)                       | 218 (55%)                           |                      |
| UNKNOWN                      | 0 (0%)                               | 4 (1.3%)                        | 3 (0.8%)                            |                      |
| Pathology/Histology per eCRF |                                      |                                 |                                     | 0.8                  |
| NON-SQUAMOUS                 | 50 (77%)                             | 221 (74%)                       | 290 (73%)                           |                      |
| SQUAMOUS                     | 15 (23%)                             | 76 (26%)                        | 106 (27%)                           |                      |

<sup>1</sup>n (%)

<sup>2</sup>Pearson's Chi-squared test; Fisher's exact test

**Supplementary Table 2:** Univariable and multivariable Cox regression for CRP kinetics and baseline characteristics in relation to OS for the entire OAK cohort.

| Characteristic               | N   | HR <sup>1</sup> | 95% CI <sup>1</sup> | p-value          |
|------------------------------|-----|-----------------|---------------------|------------------|
| <b>univariate</b>            |     |                 |                     |                  |
| CRP_resp_12                  | 758 |                 |                     |                  |
| Non-Responder                |     | —               | —                   |                  |
| Responder                    |     | 0.77            | 0.64, 0.92          | <b>0.005</b>     |
| Flare-Responder              |     | 0.52            | 0.36, 0.74          | <b>&lt;0.001</b> |
| PD-L1 score                  | 751 |                 |                     |                  |
| TC0 and IC0                  |     | —               | —                   |                  |
| TC1/2/3 or IC1/2/3           |     | 0.83            | 0.70, 0.99          | <b>0.043</b>     |
| Sex                          | 758 |                 |                     |                  |
| F                            |     | —               | —                   |                  |
| M                            |     | 1.17            | 0.98, 1.41          | 0.081            |
| Age Group 65                 | 758 |                 |                     |                  |
| < 65                         |     | —               | —                   |                  |
| >= 65                        |     | 1.01            | 0.85, 1.20          | >0.9             |
| Pathology/Histology per eCRF | 758 |                 |                     |                  |
| NON-SQUAMOUS                 |     | —               | —                   |                  |
| SQUAMOUS                     |     | 1.67            | 1.38, 2.02          | <b>&lt;0.001</b> |
| ECOG Performance Score       | 758 |                 |                     |                  |
| 0                            |     | —               | —                   |                  |
| 1                            |     | 1.50            | 1.25, 1.79          | <b>&lt;0.001</b> |
| treatment                    | 758 |                 |                     |                  |
| docetaxel                    |     | —               | —                   |                  |
| atezolizumab                 |     | 0.81            | 0.68, 0.96          | <b>0.017</b>     |
| <b>multivariate</b>          |     |                 |                     |                  |
| CRP kinetics                 | 751 |                 |                     |                  |
| Non-Responder                |     | —               | —                   |                  |
| Responder                    |     | 0.75            | 0.62, 0.90          | <b>0.002</b>     |
| Flare-Responder              |     | 0.55            | 0.38, 0.78          | <b>&lt;0.001</b> |
| PD-L1 score                  | 751 |                 |                     |                  |
| TC0 and IC0                  |     | —               | —                   |                  |
| TC1/2/3 or IC1/2/3           |     | 0.84            | 0.70, 1.00          | 0.051            |
| Pathology/Histology per eCRF | 751 |                 |                     |                  |
| NON-SQUAMOUS                 |     | —               | —                   |                  |
| SQUAMOUS                     |     | 1.62            | 1.33, 1.96          | <b>&lt;0.001</b> |
| ECOG Performance Score       | 751 |                 |                     |                  |
| 0                            |     | —               | —                   |                  |
| 1                            |     | 1.48            | 1.24, 1.78          | <b>&lt;0.001</b> |
| treatment                    | 751 |                 |                     |                  |
| docetaxel                    |     | —               | —                   |                  |
| atezolizumab                 |     | 0.82            | 0.68, 0.98          | <b>0.026</b>     |

<sup>1</sup>HR = Hazard Ratio, CI = Confidence Interval

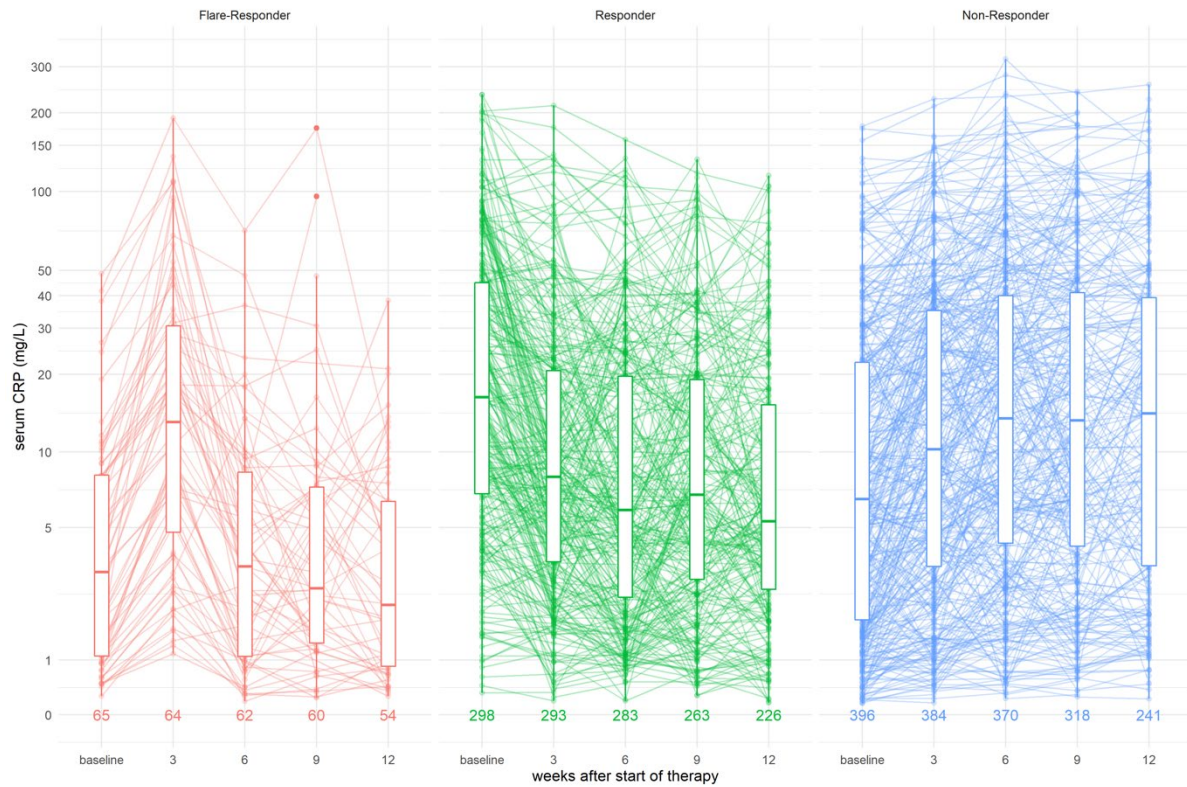

**Supplementary Figure 1: Individual CRP kinetics of the atezolizumab-treated patients stratified for the CRP-kinetics subgroups.** Individual CRP values are shown for the first three months, i.e., the observational period used for the CRP kinetics definition. Boxplots show median CRP and 1<sup>st</sup>/3<sup>rd</sup> quartiles. Colored number at the bottom of the boxplots demonstrates number at risk.
